# Supplementary material for: Virological Surveillance and Molecular Characterization of Human Parainfluenzavirus Infection in Children with Acute Respiratory Illness: Germany, 2015–2019
Source: MDPI journal article supplement (doi:10.3390/microorganisms9071508), 2021-07-14
Supplement: s1 [file s1]

# Virological surveillance and Molecular Characterization of Human Parainfluenzavirus Infection in Children with Acute Respiratory Illness: Germany, 2015-2019

Djin-Ye Oh, Barbara Biere, Markus Grenz, Thorsten Wolff, Brunhilde Schweiger, Ralf Dürrwald, Janine Reiche

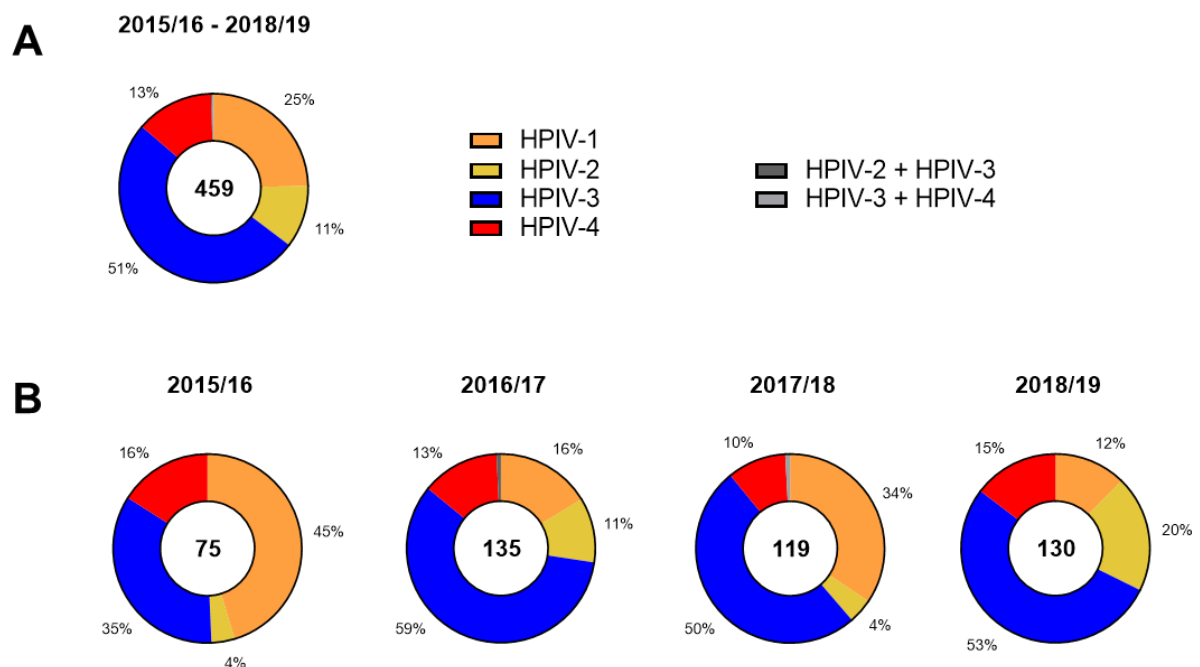

**Figure S2:** Proportion of HPIV types 1-4 in all HPIV-positive samples. (A) overall and (B) per season. Percentage values indicated for each HPIV type refer to the total number of HPIV-positive samples, which is provided in the center of each piechart.
