# Supplementary material for: Virological Surveillance and Molecular Characterization of Human Parainfluenzavirus Infection in Children with Acute Respiratory Illness: Germany, 2015–2019
Source: MDPI journal article supplement (doi:10.3390/microorganisms9071508), 2021-07-14
Supplement: s1 [file s1]

# Virological surveillance and Molecular Characterization of Human Parainfluenzavirus Infection in Children with Acute Respiratory Illness: Germany, 2015-2019

Djin-Ye Oh, Barbara Biere, Markus Grenz, Thorsten Wolff, Brunhilde Schweiger, Ralf Dürrwald, Janine Reiche

The following table provides oligonucleotide sequences used in the multiplex real-time RT-PCR for the detection of HPIV-1-4 as described previously [45].

**Table S1: Oligonucleotides used for the detection of HPIV 1-4**

| PCR                | Oligonucleotide       | Sequence (5'→3')                         | Final concentration |
|--------------------|-----------------------|------------------------------------------|---------------------|
| PIV-1<br>[HN-Gene] | HPIV-1 F7508          | TGCAATATATGCRTATTCATCAAACCTTAAT          | 300                 |
|                    | HPIV-1 R7587          | CTAATTGTAAAACCTGATATGACTTCCCTA           | 300                 |
|                    | <i>HPIV-1 MGB7539</i> | <i>ACTCAAGGATGTGCAGATA - MGB</i>         | 100                 |
| PIV-2<br>[HN-Gene] | HPIV-2 F7460          | ATCTTCAGGACTATGAAAACCATTTACC             | 300                 |
|                    | HPIV-2 R7544          | CACAACCTCCTGGTATAGCAGTGAC                | 300                 |
|                    | <i>HPIV-2 TM7489</i>  | <i>AAGTGATGGAATCAATCGCAAAAGCTGTT</i>     | 100                 |
| PIV-3<br>[HN-Gene] | HPIV-3 F8271          | GCATTGTATCATCTGTCATATTRGAYTCAC           | 600                 |
|                    | HPIV-3 R8364          | GCCAGCTCGTTYACYCTTTTCRGT                 | 600                 |
|                    | <i>HPIV-3 TM8306</i>  | <i>TCGAGAGTBAACCCAGTCATAACTTACTCAACA</i> | 150                 |
| PIV-4<br>[P-Gene]  | HPIV-4 F3028          | AGACGTCTCAAAAATTTGTTGATCAAG              | 300                 |
|                    | HPIV-4 R3103          | GGTCCAGAYAAWATGGGTCTTGCTA                | 600                 |
|                    | <i>HPIV-4 MGB3085</i> | <i>TCAAGTGTAATTGTATTRTC - MGB</i>        | 150                 |
