# Supplementary material for: Virological Surveillance and Molecular Characterization of Human Parainfluenzavirus Infection in Children with Acute Respiratory Illness: Germany, 2015–2019
Source: Microorganisms. 2021 Jul 14;9(7):1508. doi: 10.3390/microorganisms9071508 (PMC8307145; doi:10.3390/microorganisms9071508)
Supplement: Supplementary file 1 [file microorganisms-09-01508-s001.zip]

Archive with 7 entries (7 files):
- Figure_S1_Oh_et_al.pdf
- Figure_S2_Oh_et_al.pdf
- Figure_S3_Oh_et_al.pdf
- Figure_S4_Oh_et_al.pdf
- Figure_S5_Oh_et_al.pdf
- Figure_S6_Oh_et_al.pdf
- Table_S1_Oh_et_al.pdf
